# Implicit but not explicit exposure to threat conditioned stimulus prevents spontaneous recovery of threat potentiated startle responses in humans

Oyarzún JP<sup>1,2,\*</sup>, Càmarà E<sup>2</sup>, Kouider S<sup>5</sup>, Fuentemilla L<sup>1,2,4</sup>, de Diego-Balaguer R<sup>1-4</sup>

<sup>1</sup> Dept. of Cognition, Development and Educational Psychology, University of Barcelona, 08035 Barcelona, Spain

<sup>2</sup> Cognition and Brain Plasticity Group, IDIBELL, Bellvitge Biomedical Research Institute, L'Hospitalet de Llobregat, 08097 Barcelona, Spain

<sup>3</sup> ICREA, Catalan Institution for Research and Advanced Studies, 08010 Barcelona, Spain

<sup>4</sup> Institute of Neurosciences, University of Barcelona, 08035 Barcelona, Spain

<sup>5</sup> Brain and Consciousness Group, Département d'Études Cognitives, École Normale Supérieure, PSL Research University, 75005 Paris, France

\* Current affiliation: Psychology Department, New York University, New York, New York, 10003, US.

## Corresponding author

Javiera P Oyarzún  
Department of Cognition, Development and Educational Psychology  
University of Barcelona,  
Feixa Llarga s/n, 08907, L'Hospitalet (Barcelona), Spain  
Phone: +34 934034768  
Fax: +34 934021363  
Email: [javi.oyarzunb@gmail.com](mailto:javi.oyarzunb@gmail.com)

## 32 ABSTRACT

33

34 It has long been posited that threat learning operates and forms under an affective and a  
35 cognitive learning system that are supported by different brain circuits. A primary drawback in  
36 exposure-based therapies is the high rate of relapse when higher order inhibitory structures  
37 failed to inhibit the emotional responses driven by the defensive circuit. It has been shown that  
38 implicit exposure of fearful stimuli leads to a long-lasting reduction of avoidance behavior in  
39 patients with phobia through the facilitation of fear processing areas in the absence of subjective  
40 fear. Despite the potential benefits of this approach in the treatment of phobias and PTSD,  
41 implicit exposure to fearful stimuli is still under-investigated. Here, we used unconscious  
42 presentation of threat-conditioned stimuli in healthy humans, using a continuous flash  
43 suppression technique. We found that implicit exposure of a conditioned stimulus reduced, on  
44 the following day, defensive responses to the conditioned stimulus measured by threat-  
45 potentiated startle responses but not by the electrodermal activity. Our results suggest that  
46 implicit exposure using CFS might facilitate the modulation of the affective component of  
47 fearful memories, representing an important therapeutic target to further advance exposure-  
48 based psychotherapies.

49

50 **Keywords: threat-potentiated startle responses, electrodermal activity, skin conductance**  
51 **response, fear conditioning, threat conditioning, extinction learning, implicit exposure.**

52

53

## 54 INTRODUCTION

55

56 The ability to learn that previously threatening stimuli are no longer a threat is critical for  
57 mental health since the disruption of this process can lead to anxiety disorders like phobias and  
58 post-traumatic stress disorder, PTSD. A long-standing critical issue in the treatment of threat-  
59 related memories is the high rate of relapse after initially successful therapy (Craske and  
60 Mystkowski, 2006).

61

62 It has been established that threat learning operates and forms supported by two distinct brain  
63 circuits (Hamm and Vaitl, 1996; LeDoux, 1993). The first is an affective learning system  
64 grounded in the defensive circuit based in the amygdala and operating implicitly (LeDoux,  
65 1993). The second is a cognitive learning system, associated with the acquisition of the  
66 declarative knowledge of stimuli contingencies, expectancy of threat and conscious experience

67 of fear that is sustained by hippocampal and prefrontal brain areas (Baeyens et al., 1995; Lang  
68 et al., 2000; LeDoux and Brown, 2017; Purkis and Lipp, 2001).

69

70 Exposure-based therapy is the most used procedure to treat threat-related memories (Rothbaum  
71 and Davis, 2003) and is founded on the principles of extinction learning (Craske, 1999; Milad  
72 and Quirk, 2012) where the threat-predicting stimulus (i.e., conditioned stimulus, CS) is  
73 repeatedly presented in the absence of the negative outcome (e.g., unconditioned stimulus, US).  
74 Through this procedure, subjects learn an inhibitory memory that, relying on prefrontal  
75 structures (e.g., dorsolateral and ventromedial prefrontal cortex) (Phelps et al., 2004; Schiller et  
76 al., 2013), suppresses the expression of the defensive responses initiated by amygdala-  
77 subcortical structures (Pare and Duvarci, 2012; Sotres-Bayon et al., 2006). However, this  
78 inhibitory function often fails, and defensive responses are spontaneously recovered with the  
79 passage of time (Rescorla, 2004).

80

81 It has been suggested that since extinction learning leaves the affective memory fairly intact  
82 (Baeyens et al., 1995; Myers and Davis, 2002), such implicit trace could later motivate fear  
83 recovery, especially when the inhibitory structures (i.e., the prefrontal cortex) are impaired, as is  
84 the case with anxiety-related patients (Konarski et al., 2007; Sotres-Bayon et al., 2006), or under  
85 stressful situations (J and Nadel, 1985). Some studies have shown that procedures that avoid  
86 prefrontal cortex (PFC) engagement to inhibit threat-related memories are highly effective in  
87 preventing the recovery of defensive responses to threat conditioned or phobic stimuli (Koizumi  
88 et al., 2016; Schiller et al., 2013; Siegel and Weinberger, 2009). Of particular interest are the  
89 works of Siegel and Weinberg (Siegel and Warren, 2013a, 2013b) showing that very brief  
90 repeated masked exposure to phobic stimuli led to long-lasting reduction in avoidance  
91 behaviour in spider-phobics. In a recent fMRI study, the authors (Siegel et al., 2017) suggested  
92 that the beneficial effects of masked exposure might have been mediated through a facilitation  
93 of threat memory processing and the activation of regulation areas as participants do not

94 experience subjective distress during exposure. To date, however, implicit exposure is still  
95 under-investigated, harboring important theoretical as well as clinical implications.

96

97 Here, we investigated the effects of implicit exposure on a fearful memory after 24h, using a  
98 continuous flash suppression technique (CFS). To model fear acquisition and exposure-based  
99 therapy, healthy participants were threat conditioned on day 1 to fearful faces. On day 2 stimuli  
100 were presented through a stereoscope, either invisibly (through CFS) for the implicit group or  
101 explicitly for the explicit group. On day 3 participants were normally presented to threat  
102 conditioned stimuli and recovery of defensive responses were tested by analyzing threat-  
103 potentiated startle responses, electrodermal activity, and online expectancy reports.

104 As it has been suggested by other authors (“Anxious: The Modern Mind in the Age of Anxiety  
105 by Joseph E LeDoux, book review,” n.d.; Brewin, 2001; Siegel et al., 2017), we predict that by  
106 restraining cognitive-mediated fear processing, implicit exposure would promote threat memory  
107 processing at the implicit level and hinder the recovery of defensive responses.

108

109

## 110 MATERIALS AND METHODS

### 111 Participants

112 ***Implicit group.*** Fifty-nine (46 female,  $M = 22.95$  years,  $SD = 3.78$ ) healthy students with normal  
113 or corrected-to-normal vision were recruited for this group. On the first day, we excluded 16  
114 participants that did not meet the threat acquisition criteria (see *exclusion criteria for*  
115 *acquisition*). From these, 23 more participants were excluded on the second day because they  
116 broke the suppression effect during implicit exposure (see *exclusion criteria for image*  
117 *suppression*). A final sample of 20 participants fulfilled the criteria for inclusion and followed  
118 the three consecutive-days experimental protocol of the implicit group.

119 ***Explicit group.*** Thirty-two healthy students with normal or corrected-to-normal vision were  
120 recruited for this group (25 female,  $M = 20.5$  years,  $SD = 2.39$ ). On day 1, we excluded 13

121 participants that were not threat conditioned and three that were non-responders (see *exclusion*  
122 *criteria for acquisition*). One participant did not return for day 3. A final sample of 15  
123 participants fulfilled the criteria for inclusion and followed the three consecutive-days  
124 experimental protocol of the explicit group.

125 The study was approved by the Institute of Biomedical Research of Bellvitge ethics committee  
126 and all subjects from both groups signed an informed consent before their participation.

127

## 128 **Psychological Inventories**

129 In order to control for psychological individual differences that could influence threat learning,  
130 all participants completed the Spanish version of the Spielberger State-Trait (STAI-T), the  
131 State-State (STAI-S) Anxiety Inventory (Spielberger, 1983) and the Spanish version of the 25-  
132 item English Resilience Scale (Wagnild and Young, 1993) containing the ‘Acceptance of Self  
133 and Life’ (ASL) and “Personal Competence” (PC) subscales.

134

## 135 **Stimuli**

136 **Visual Stimuli.** We employed Ekman’s fearful faces (Ekman, 1976) as the conditioning stimuli  
137 (CS) as they can be processed in the absence of awareness through a rapid subcortical amygdala  
138 route (McFadyen et al., 2017). Faces were presented for 5 seconds with inter-trial intervals (ITI)  
139 of 10-12 seconds (after electrodermal activity was stabilized). Stimuli order presentation was  
140 randomized with the constraint that no more than 3 repetitions of the same stimuli occurred.  
141 Stimuli were displayed on a 22-inch computer monitor (resolution = 1,024 × 768 pixels; refresh  
142 rate = 60 Hz) and were controlled using Psychophysics Toolbox software (Brainard, 1997; Pelli,  
143 1997). Stimulus contrast was equally set for all participants, at a level that was clearly visible  
144 when viewed on its own but was also easily suppressed with continuous flash suppression  
145 (CFS) (see CFS in experimental task below).

146

147 **Electrical Stimulation.** We used a mild electric shock to the wrist as the unconditioned stimulus  
 148 (US) during threat conditioning on day 1. Shocks were delivered through an electrode attached  
 149 with a Velcro strap to participants' dominant inner wrist, with a maximum intensity of 15mA  
 150 and 50 ms duration and co-terminated with faces presentation (Oyarzún et al., 2012). A Grass  
 151 Medical Instruments stimulator (Grass S48 Square Pulse Stimulator) charged by a stabilized  
 152 current was used with a Photoelectric Stimulus Isolation Unit (Model PSIU6). At the beginning  
 153 of the session, participants regulated shock intensity to a level which they described as very  
 154 uncomfortable yet not painful.

155 **Air-puffs.** In order to measure threat-potentiated startle responses (see below), we mechanically  
 156 provoked blink responses by delivering 40 ms air-puffs, through a hosepipe directed to the  
 157 anterior part of the temporal region between the outer canthus of the eye and the anterior margin  
 158 of the auditory meatus (Haerich, 1994; Hawk and Cook, 1997) of the dominant-hand side. Air-  
 159 puffs were delivered 4.5 s after every face presentation onset (did not overlap with electrical  
 160 stimulations) and during every other intertrial interval (ITI). In order to habituate subjects to air-  
 161 puff stimulation, each day started with 10 startle probes (Sevenster et al., 2012a).

162

## 163 **Experimental Task**

### 164 **Day 1. Fear acquisition**

165 On day 1, participants were randomly presented with 3 fearful faces, 8 times each. Two of them  
 166 (CS1 and CS2) co-terminated with a mild electric shock to the wrist on 75% of the trials  
 167 (reinforcement was omitted in the 1st and 5th trial) and a third one was never followed by the  
 168 aversive stimulus (neutral stimulus, NS). Face gender was counterbalanced and randomized  
 169 across participants. To acquire asymptotic levels of learning, participants were instructed that  
 170 two faces were going to be followed, most of the time, by an electric shock, while the third one  
 171 was safe (Figure 1).

172 **Exclusion criteria for acquisition.** The first exclusion criterion aimed to ensure that participants  
 173 were fear-conditioned. We selected participants that showed differential electrodermal activity  
 174 and startle potentiation to both threat-conditioned stimuli compared to neutral, this is; the

175 average of the final 4 trials, in the acquisition session, for both CSs was greater than for the NS  
176 stimulus in the EDA or SR index. In addition, we excluded non-responder participants who  
177 showed below 0.02  $\mu$ S peak to peak amplitude in the EDA index in more than 75% of  
178 unreinforced trials during acquisition (Raio et al., 2012).

179

## 180 **Day 2. Exposure session**

### 181 ***Implicit exposure group***

182 Twenty-four hours after threat conditioning, using a stereoscope and the CFS technique (see  
183 CFS below) participants were unconsciously exposed with only two of the images presented on  
184 day 1: CS1 and NS, 16 times each in the absence of electric shocks. In order to control for  
185 participants' awareness of the face presentation, we asked for a subjective report using the  
186 keyboard arrows. After each trial, they were asked: 'Do you think you might have seen a face?'  
187 'Yes' or 'No', and then 'Was it a male or a female?' Subjects then indicated 'male' or 'female'  
188 and how sure they were of their answer with 'sure' or 'not sure'.

189 *Detection task.* In order to dissuade participants to voluntarily explore the non-dominant eye (by  
190 closing one eye) and thus break the CFS effect, we included a simple detection task on the  
191 dominant eye during Mondrian display (see CFS below). Three seconds after Mondrian onset, a  
192 central grey dot would randomly change to a different color for 1 second. At the end of the three  
193 awareness questions participants had to answer whether the dot had turned to green or not;  
194 although no feedback was received after each response participants were encouraged to be  
195 accurate in this task. Participants were pre-trained for this task in the training session (see  
196 training session below).

197 ***Exclusion criterion for image suppression.*** To ensure full image suppression we excluded  
198 participants that answered, in at least one trial: 'yes' to the first question ('*Do you think you*  
199 *might have seen a face?*') and were correct and confident (answered 'sure') in indicating the  
200 gender of the perceived face. Following this selection criteria, all the participants included in the

201 final sample reported not seeing anything besides the Mondrian at all trials; this is, for every  
 202 trial the participants included in the sample answered ‘No’ to the first question (except for one  
 203 subject that answered seeing something on one trial), they all guessed faces at chance in the  
 204 second question (main percentage of hits 46.71%; SD= 7.5; [34.38% – 58.06%]) and responded  
 205 to be ‘*not sure*’ about the guess in the third question. Participants learned to answer these 3  
 206 awareness questions during the training session on day 2.

207

208 **Continuous Flash Suppression (CFS).** We employed the continuous flash suppression (CFS)  
 209 technique, a binocular rivalry-based method capable of reliably suppressing visual awareness  
 210 despite stimulus presentation for long periods of time (Fang and He, 2005; Lin and He, 2009;  
 211 Tsuchiya and Koch, 2005). Using a mirror stereoscope (Stereoaids, Australia) placed 45 cm  
 212 from the screen, we presented a continuously flashing colorful pattern (Mondrian) (at 10Hz) to  
 213 the dominant eye and low-contrast (albeit visible) faces to the other, non-dominant eye.  
 214 Mondrians were created with Matlab (MathWorks, Natick, MA) and the Psychtoolbox  
 215 (Brainard, 1997; Pelli, 1997) and were presented for 5.5 seconds, starting 500 ms before face  
 216 onset. In this manner, target faces were rendered invisible to the participants and thus processed  
 217 without awareness. To determine eye dominance we used a sighting dominance test (Porac and  
 218 Coren, 1976) where we asked participants to hold, with extended arms, a plastic board and look  
 219 through a central small aperture to a picture placed on the wall at a 2-meter distance. The  
 220 investigator would then cover one participants’ eye at a time and ask for a subjective report of  
 221 the image. If the image was no longer seen when covering a certain eye then that eye was  
 222 considered dominant.

223 **Training session.** After the eye dominance test and before starting the experiment on day 2,  
 224 participants had a training session for 5 minutes to calibrate the stereoscope, ensure image  
 225 suppression and familiarize participants with the task and questions. First, a black and white  
 226 image of a zebra was presented to one eye and the zebra outline was presented to the other. The  
 227 subjects adjusted the mirrors of the stereoscope using two knobs so that each eye in isolation  
 228 saw either the full zebra or the full zebra outline, and with two eyes the zebra was aligned



229 within the zebra outline. Then, subjects in both groups initiated a training sequence using 6  
230 presentations of random objects (instead of the faces) where they were familiarized with the 3  
231 awareness questions and, in the case of the implicit group, with the detection task.

### 232 **Explicit exposure group.**

233 Participants followed the same procedure as the implicit group (same number, ITI, and length of  
234 stimuli presented through the stereoscope). However, for this group, face-pictures were  
235 explicitly presented. Mondrians were presented (in the dominant eye) for only 500 ms before  
236 face-picture presentation, so faces were fully visible to the participants, for the following 5  
237 seconds (the same duration as in the implicit group), in the non-dominant eye. In the same way,  
238 as with the implicit group, the same three questions regarding picture awareness followed each  
239 image presentation. In order to encourage participants to pay attention to faces presentation, this  
240 group did not perform the color detection task. All participants reported seeing the faces at all  
241 trials; this is, they answered ‘Yes’ to the first question (except for one subject that reported not  
242 seeing a face on one trial), presented 100% accuracy in gender detection and were always sure  
243 about their response.

244

### 245 **Day 3**

246 **Spontaneous recovery test.** After 24 hours we tested for recovery of defensive responses to all  
247 stimuli. Participants were presented with the three faces they saw on the first day, 6 times each  
248 in the absence of the shock. To remove attentional orienting effects on the first trials, an extra  
249 presentation of the neutral stimulus, which was not included in the analysis, was presented at the  
250 beginning of this session.

251

252 **Online threat expectancy ratings.** During the spontaneous recovery test participants had to  
253 indicate whether they expected to receive, or not, an electric shock after seeing each face on the  
254 screen. One second after face presentation the question ‘Are you expecting to receive a shock?’

255 appeared on the screen for 3 seconds. Participants answered, using the arrows of the keyboard,  
256 'Yes', 'No' or 'I don't know'.

257

## 258 **Measures**

### 259 **Threat-potentiated startle responses (SR)**

260 Startle responses were analyzed after delivery of air-puffs. We performed a monocular  
261 electromyography (EMG) on the orbicularis ocular muscle of the dominant eye. A 6 mm  
262 Ag/AgCl electrode filled with a conductive gel was placed 1.5 cm below the lower eyelid in line  
263 with the pupil at forward gaze, a second electrode was placed 2 cm lateral to the first one  
264 (center-to-center), and a signal ground electrode was placed on the forehead 2 cm below the  
265 hairline (Blumenthal et al., 2005).

266 **EMG data analysis for SR.** Raw EMG data were notched and band-pass filtered (28-500 Hz,  
267 Butterworth, 4<sup>th</sup> order), and afterward rectified (converting data points into absolute values) and  
268 smoothed (low-pass filter 40 Hz) (Blumenthal et al., 2005). Peak blink amplitude was  
269 determined in a 30-150 ms interval following air-puff delivery. EMG values were standardized  
270 using within-participant Z scores for each day, and outliers ( $Z > 3$ ) were replaced by a linear  
271 trend at point (Sevenster et al., 2012a). For comparisons between exposure on day 2 and  
272 spontaneous recovery test on day 3, Z scores were calculated using both exposure and recovery  
273 test data. For comparisons within stimuli (CS1, CS2 and NS) on day 3, Z scores were calculated  
274 using only recovery test data.

275

### 276 **Electrodermal activity (EDA)**

277 Electrodermal activity and EMG was sampled at 1000Hz and was recorded during the whole  
278 session using Brain Amps amplifiers. EDA was assessed using two Ag-AgCl electrodes  
279 connected to a BrainVision amplifier. The electrodes were attached to the middle and index  
280 fingers of the non-dominant hand.

281 **EDA data analysis.** EDA waveforms were low-pass filtered (1Hz) and analyzed offline with  
282 Matlab 7.7. F. Single-trial changes in EDA were determined by taking the base-to-peak

283 difference for a 4.5 s window after stimulus onset and before air-puff (or electric shock)  
 284 delivery. The resulting amplitude of the skin conductance response (SCR) value was  
 285 standardized using within-participant Z scores for each day, and outliers ( $Z > 3$ ) were replaced  
 286 by a linear trend at point (Sevenster et al., 2012a). As for EMG analyses, comparisons between  
 287 exposure on day 2 and spontaneous recovery test on day 3 used Z scores calculated using both  
 288 exposure and recovery test data. For comparisons within stimuli (CS1, CS2 and NS) on day 3, Z  
 289 scores were calculated using only recovery test data.

290

### 291 **Online US-expectancy ratings (OER)**

292 Since explicit evaluation of contingencies could affect learning during fear acquisition and  
 293 extinction learning during exposure, expectancy ratings were made only during day 3. After  
 294 each image presentation, the question “Are you expecting to receive an electrical shock?”  
 295 appeared on the top of the screen for 3.5 seconds to which participants answered “Yes” (scored  
 296 3), “No” (scored 1) or “I don’t know” (scored 2) using the keyboard. Participants were  
 297 encouraged to maintain their hands over the keyboard at all times and to restrict hand and head  
 298 movement as much as possible.

299

300

## 301 **RESULTS**

302

### 303 **Acquisition**

304 **Equivalent levels of threat acquisition for conditioned stimuli in both groups and in both**  
 305 **measures.**

306 *Threat Potentiated Startle responses (SR).* A two-way mixed analyses of variance (ANOVA)  
 307 with group (implicit versus explicit) as a between-subject factor and stimuli (CS1 CS2 and NS)  
 308 as a within-subject factor showed equivalent levels of SR for both groups in the last 4 trials (all  
 309 p values  $> .1$  for group and group x stimuli interaction) but a main effect of stimuli ( $F_{(2,66)} =$

12.23;  $p < .001$  ;  $\eta^2 = .27$ ) (Figure 2A). A Repeated Measures ANOVA (RM-ANOVA) combining both groups showed successful threat conditioning results: a main effect of stimuli ( $F_{(2,68)} = 12.12$ ;  $p < .001$ ;  $\eta^2 = .26$ ) with equal responses for CS1 and CS2 (Paired t-test,  $t_{34} = -.59$  ;  $p = .55$  ;  $d = .10$ ) that were greater in comparison with NS (Paired t-test CS1-NS,  $t_{34} = 4.51$ ;  $p < .001$  ;  $d = .76$ , CS2-NS  $t_{34} = 3.75$ ;  $p = .001$ ;  $d = .63$ ).

*Electrodermal activity (EDA)*. EDA analyses showed similar results. Responses were equivalent between groups (all  $p$  values  $> .1$  for group and group x stimulus interaction) but a main effect of stimuli was observed ( $F_{(2,66)} = 26.61$ ;  $p < .001$ ;  $\eta^2 = .44$ ) (Figure 3A). A RM-ANOVA combining both groups showed successful threat conditioning results with a main effect of stimulus ( $F_{(2,68)} = 28.48$ ;  $p < .001$  ;  $\eta^2 = .45$ ) where CS1 and CS2 showed equivalent responses (paired t-test  $t_{34} = .29$ ;  $p = .76$ ;  $d = .05$ ) but greater than the NS (CS1-NS  $t_{34} = 6.04$ ;  $p < .001$ ;  $d = 1.02$ , CS2-NS  $t_{34} = 5.88$ ;  $p < .001$ ;  $d = .99$ ).

## Exposure session

**Gradual overall decrease of responses during exposure session with no differences between groups nor between stimuli, in both measures.**

We then analyzed the course of extinction learning during exposure using a two-way mixed ANOVA with group (implicit versus explicit) as an inter-subject factor and stimulus (CS1 and NS) and time (first trials 1-2 and last trials 15-16) as intra-subject factors.

*Threat Potentiated Startle reflex (SR)*. We found no differences in responses between groups nor differential responding between stimuli (all  $p$  values  $> .5$  for group, stimulus, and group x stimulus interaction). When looking at differences across time we found a decrease in responses from beginning to end of the session (main effect of time;  $F_{(1,33)} = 55.57$ ;  $p < .001$ ;  $\eta^2 = .62$ ) that was equivalent between groups and stimuli (all  $p$  values  $> .1$ ) (Figure 2B).

*Electrodermal activity (EDA)*. EDA analyses showed similar results; no differences between groups nor between stimuli (all  $p$  values  $> .1$  for group, stimulus, and group x stimulus interaction) (Figure 3B). Again, we found a decrease in responses from beginning to end of the

session (main effect of time;  $F_{(1,33)} = 57.50$ ;  $p < .001$ ;  $\eta^2 = .63$ ) that was equivalent between groups and stimuli (all  $p$  values  $> .1$ ).

### Spontaneous Recovery Test

To test the recovery of defensive responses on day 3, we compared the last trial of the exposure session with the first trial of the spontaneous recovery test for CS1 and NS (Oyarzún et al., 2012; Schiller et al., 2010, 2013; Soeter and Kindt, 2011; Warren et al., 2014) (Figure 4).

We first compared recovery of defensive responses between groups, for the startle responses and for the electrodermal activity. And secondly, we compared the differential responses between the EDA and the SR measures within each group.

**CS1, in the implicit group, showed no recovery of responses from the end of exposure session to the beginning of the recovery test. Only CS1 in the implicit group showed lower responses in comparison with CS2.**

*Threat potentiated Startle Reflex (SR).* A two-way mixed ANOVA with group (implicit versus explicit) as a between-subjects factor, and phase (exposure and recovery test) and stimulus (CS1 and NS) as within-subject factors, revealed no main effect of group ( $F_{(1,33)} = .30$ ,  $p = .58$ ;  $\eta^2 = .00$ ). A main effect of phase ( $F_{(1,33)} = 38.92$ ;  $p < .001$ ;  $\eta^2 = .54$ ) that was equivalent between groups (phase  $\times$  group  $F_{(1,33)} = 1.06$ ;  $p = .31$ ;  $\eta^2 = .03$ ) indicated that SR responses increased at recovery in both groups. However, we found a significant stimuli  $\times$  group interaction ( $F_{(1,33)} = 10.0098$ ,  $p < .005$ ;  $\eta^2 = .23$ ) (Figure 4A-B). We thus compared stimuli responses between groups. Unpaired t-test showed similar responses for the NS in both groups ( $t_{(33)} = 1.52$ ;  $p = 1.13$ ;  $d = .49$ ) but lower responses for the CS1 in the implicit than the explicit group ( $t_{(33)} = -2.19$ ;  $p = .03$ ;  $d = .74$ ). Intra-group comparison of stimuli showed, in the implicit group, lower responses for the CS1 in comparison with the NS ( $t_{(19)} = -2.97$ ;  $p = .008$ ;  $d = .66$ ). In contrast,

362 similar responses for NS and CS1 were found in the explicit group ( $t_{(14)} = 1.68$ ;  $p = .11$ ;  $d =$   
363  $.43$ ), indicating that implicit but not explicit exposure reduced SR responses to CS1.

364 We then compared CS1 responses with CS2 on day 3; another homologous stimulus that was  
365 equally threat conditioned in the first session, but that was not exposed to participants on day 2  
366 (Figure 2C). A two-way mixed ANOVA with group (implicit versus explicit) and stimulus  
367 (CS1, CS2 and NS, standardized within day 3) as a between and within-subject factors  
368 respectively, revealed a significant group x stimulus interaction ( $F_{(2,66)} = 3.93$ ;  $p = .02$ ;  $\eta^2 = .11$ ).  
369 Whereas in the explicit group all stimuli (i.e. CS1 NS CS2) showed comparable high responses  
370 (all  $p$  values  $> .1$ ), differences across stimuli were found in the implicit group (implicit  $F_{(2,38)} =$   
371  $3.44$ ;  $p = .04$ ;  $\eta^2 = .15$ , explicit  $F_{(2,28)} = 1.37$ ;  $p = .26$ ;  $\eta^2 = .09$ ), where only CS1 showed reduced  
372 response compared to the CS2 ( $t_{(19)} = -2.09$ ;  $p = .04$ ,  $d = .46$ ) and NS ( $t_{(19)} = -2.77$ ;  $p = .01$ ,  $d =$   
373  $.62$ ).

374

375 **EDA remained equivalent in both groups, with an overall increased activity from exposure**  
376 **session to recovery test but greater recovery for CS1s that was comparable to CS2s**  
377 **responses.**

378 *Electrodermal activity (EDA)*. A two-way mixed ANOVA with group (explicit versus implicit)  
379 as an inter-subject factor, and phase (exposure and test) and stimuli (CS1 and NS) as within  
380 factors revealed a main effect of phase ( $F_{(1,33)} = 70.04$ ;  $p < .001$ ;  $\eta^2 = .69$ ), stimuli ( $F_{(1,33)} =$   
381  $15.98$ ;  $p < .001$ ;  $\eta^2 = .32$ ) and phase x stimuli interaction ( $F_{(1,33)} = 18.02$ ;  $p < .001$ ;  $\eta^2 = .35$ ), but  
382 no differences were found between groups (all  $p$  values  $> .1$  for group, group x stimulus and,  
383 group x stimulus x phase interaction) (Figure 4 C-D). We thus combined groups and compared  
384 stimuli responses between phases. As expected, responses significantly increased from the end  
385 of the exposure session to the recovery test in both stimuli (paired t-test NS  $t_{(34)} = -5.37$ ;  $p <$   
386  $.001$ ;  $d = -0.90$ , CS1  $t_{(34)} = -7.10$ ;  $p < .001$ ,  $d = -1.2$ ). And, although responses between stimuli  
387 were comparable at the end of the exposure session ( $t_{(34)} = -.40$ ;  $p = .68$ ;  $d = -.06$ ), responses in

the recovery test were greater for CS1 than for NS ( $t_{(34)} = 3.93$ ;  $p < .001$ ;  $d = 0.66$ ). Thus, showing that in both groups, CS1 and NS, incremented EDA responses from the end of day 2 to test, but with greater recovery for CS1.

We then explored whether such recovery in the CS1 was similar to the response of its conditioned homologous CS2 on day 3 (Figure 3C). A mixed ANOVA with group and stimuli (CS1, CS2 and NS) showed no differences across groups (all  $p$  values  $> .5$  for group and group x stimulus interaction) but a main effect of stimulus ( $F_{(2,66)} = 15.21$ ;  $p < .001$ ;  $\eta^2 = .32$ ) that was driven by equal responses for CS1 and CS2 on day 3 (paired t-test  $t_{(34)} = .70$ ,  $p = .48$ ,  $d = .11$ ) but greater than NS (CS1-NS  $t_{(34)} = 5.48$ ,  $p < .001$ ,  $d = .92$ , CS2-NS  $t_{(34)} = 5.15$ ,  $p < .001$ ,  $d = .87$ ). Thus, in the EDA measure, regardless of type of exposure, conditioned stimuli CS1 showed equivalent increased recovery than CS2 on day 3.

**Comparisons between measures within groups. The implicit group showed a down-modulation of CS1 in the recovery test in the SR but not in the EDA. In contrast, the explicit group showed greater responses for CS1 and CS2 than NS in both the EDA and SR.**

In order to directly compare the differential responses in the EDA and the SR measures we tested whether the recovery of defensive responses was different between measures within each group. We performed RM-ANOVA with measure (SR and EDA), phase (exposure and test) and stimulus (CS1 NS) as within-subject factor, separately for each group. The implicit group showed a main effect of stimuli ( $F_{(1,19)} = 44.83$ ,  $p < .001$ ;  $\eta^2 = .70$ ), and interestingly a significant interaction of stimulus x measure ( $F_{(1,19)} = 8.81$ ,  $p < .01$ ;  $\eta^2 = .31$ ) and stimulus x measure x phase ( $F_{(1,19)} = 6.32$ ,  $p = .02$ ;  $\eta^2 = .25$ ) (Figure 4 A-C). Follow-up paired t-test showed greater CS1 responses from exposure to test in the EDA measure ( $t_{(19)} = -4.15$ ,  $p < .005$ ;  $d = -.92$ ) but not in the SR measure ( $t_{(19)} = -1.87$ ,  $p = .07$ ;  $d = -.42$ ). In contrast, the NS showed increment of responses in both measures (EDA  $t_{(19)} = -4.13$ ,  $p = .001$ ;  $d = -.92$ ; SR  $t_{(19)}$

414 = -4.2,  $p < .001$ ;  $d = -.95$ ). Thus, indicating that CS1 responses were divergently down-  
415 modulated in the SR index but not in the EDA.

416 The explicit group showed a main effect of phase ( $F_{(1,14)} = 66.65$ ,  $p < .001$ ;  $\eta^2 = .82$ ), stimuli ( $F_{(1,14)} = 10.72$ ,  $p = .006$ ;  $\eta^2 = .43$ ) and again significant interactions of: stimulus x phase ( $F_{(1,14)} = 8.32$ ,  $p = .01$ ;  $\eta^2 = .37$ ), stimulus x measure ( $F_{(1,14)} = 7.66$ ,  $p = .01$ ;  $\eta^2 = .35$ ) and stimulus x phase x measure ( $F_{(1,14)} = 5.25$ ,  $p = .03$ ;  $\eta^2 = .27$ ) (Figure 4 B-D). First, we looked for stimuli responses increments from the exposure session to test. In this case, significant increments were found in both measures for both stimuli [CS1 (EDA  $t_{(19)} = -6.77$ ,  $p < .001$ ;  $d = -1.51$ ; SR  $t_{(19)} = -4.01$ ,  $p = .001$ ;  $d = -.89$ ), and NS (EDA  $t_{(14)} = -3.59$ ,  $p = .003$ ;  $d = -.92$ , SR  $t_{(19)} = -3.74$ ,  $p = .002$ ;  $d = -.96$ ). We then looked for stimuli responses between phases. In the recovery phase, we found that whereas CS1 and NS responses were equivalent in SR (paired-t-test  $t_{(14)} = -1.34$ ,  $p = .20$ ,  $d = -.34$ ) responses in the EDA were greater for the CS1 (paired-t-test  $t_{(14)} = 4.25$ ,  $p = .001$ ,  $d = 1.09$ ). Thus showing that the explicit group increased responses for both stimuli in both measures but in the EDA the recovery was greater for the CS1.

428

### 429 **Online Threat Expectancy Ratings (OER) on day 3**

430 **Participants' explicit contingency learning was not modulated by either implicit or explicit**  
431 **exposure.**

432 We then explored on day 3 whether participants expected to be shocked after the presentation of  
433 the faces (Figure 5). A two-way mixed ANOVA with group (implicit versus explicit) as  
434 between-subject factor and stimuli (CS1, CS2 and NS) and time (mean of the first 2 trials versus  
435 mean of the last 2 trials) as within-subject factor showed no differences between groups (all  $p$   
436 values  $> .1$  for group, group x stimuli and group x time interaction). Thus, these results  
437 indicated that our experimental manipulation did not affect OER. However we found a main  
438 effect of stimuli ( $F_{(2,66)} = 50.34$ ;  $p < .001$ ,  $\eta^2 = .33$ ), time ( $F_{(2,66)} = 16.25$ ;  $p < .001$ ,  $\eta^2 = .33$ ) and  
439 stimuli x time interaction ( $F_{(2,66)} = 5.16$ ;  $p < .005$ ,  $\eta^2 = .13$ ). We thus explored stimuli responses



across time. We found that participants expectancy scored for CS1 and CS2 stimuli decreased from beginning to the end during the recovery session (CS1  $t_{(34)} = 3.39, p < .005; d = .57$ , CS2  $t_{(34)} = 3.72, p < .005; d = .63$ ). Interestingly and congruent with the threat generalization responses to the NS in the first trials of the recovery test, NS also showed a decrease of responses from beginning to the end of session (NS  $t_{(34)} = 2.71, p = .01; d = .45$ ), as some subjects reported not to be sure of expecting to be shocked when presented with the NS (scored = 2) in the first trials. As expected, although shock expectancy was similar between CS1 and CS2 at both the beginning and end of the session (all  $p$  values  $> .5$ ), NS scores were significantly lower at both the beginning (CS1-NS  $t_{(34)} = 8.90, p < .001; d = 1.52$ , CS2-NS  $t_{(34)} = 8.44, p < .001; d = 1.42$ ) and end of the session (CS1-NS  $t_{(34)} = 5.60, p < .001; d = .94$ , CS2-NS  $t_{(34)} = 5.23, p < .001; d = .88$ ). Thus, participants maintained the cognitive threatful representation for conditioned stimuli from the beginning to the end of the session.

452

## 453 **PSYCHOLOGICAL INVENTORIES**

### 454 **Equivalent scores between groups**

Since anxiety traits have been previously related to aspects of implicit emotional learning (Raio et al. 2013) we checked whether our participants presented equivalent scores between groups in the psychological inventories. No significant differences were found between groups in any of the psychological inventories (see Table 1 for descriptive statistics); participants showed similar scores in the Spanish version of the STAI-state Inventory (unpaired  $t$ -test;  $t_{(33)} = -.55, p = .58, d = .19$ ), the STAI-trait inventory ( $t_{(33)} = -1.55, p = .12, d = .52$ ) and the Spanish version of the 25-item English Resilience with ASL and PC subscales (Group,  $F_{(1,33)} = .69; p = .41; \eta^2 = .02$ , group x scale interaction,  $F_{(1,33)} = 1.00; p = .32; \eta^2 = .03$ ).

These results indicate that the differences observed for the implicit and explicit groups are unlikely to be due to differences in anxiety and resilience traits between the groups.

465

466

## 467 **DISCUSSION**

468

469 Two groups of participants underwent a partial reinforced threat-conditioning paradigm using  
470 three fearful faces. Two of the faces co-terminated with a mild electric shock to the wrist on  
471 75% of trials (conditioned stimuli; CS1 and CS2) while a third face served as the neutral  
472 stimulus (NS).

473 On the second day, one group of participants underwent implicit while the other underwent  
474 explicit exposure to one of the threat conditioned stimulus. For the implicit condition, CS1 and  
475 NS were presented unconsciously using the continuous flash suppression (CFS) technique and  
476 no shocks were administered, while CS2 was not presented. The explicit group followed the  
477 same procedure except that pictures were explicitly presented (see Materials and Methods  
478 section). On the following day, we tested spontaneous recovery, by presenting all participants  
479 explicitly with the three faces in the absence of electric shocks (see design in Figure 1). We used  
480 a combination of measures to examine defensive responses: threat-potentiated startle reflex  
481 (SR), electrodermal activity (EDA) and online expectancy ratings (OER).

482

483 We found that exposing participants implicitly with previously threat conditioned stimulus  
484 reduced the recovery of defensive responses after 24h, measured by SR, but not by EDA or  
485 OER.

486 Our results highlight the divergent expression between two physiological measures (EDA and  
487 SR) where implicit exposure only modulated threat potentiated SR. Dissociation between both  
488 measures has long been recognized and although there is still much debate about the nature of  
489 each measure it has been suggested that they are differently modulated by different neural  
490 systems during threat memory encoding, extinction, and retrieval (Sevenster et al., 2014; Soeter  
491 and Kindt, 2010).

492 In our experiment on day 3, EDA followed a similar pattern of responses as those presented by  
 493 the OER, but only at the beginning of the test session; higher responses for CS1 and CS2 than  
 494 for NS that gradually decreased throughout the session. Such correspondence across both  
 495 measures fits well with the idea that EDA is sensitive to modulations of threat explicit  
 496 expectancies (Lovibond, 2003; Sevenster et al., 2014; Soeter and Kindt, 2010). However, the  
 497 fact that OER and EDA, increasingly dissociated as the session progressed; with a stronger drop  
 498 in EDA to all stimuli (Figure 3) but sustained high OER (Figure 5) suggest that EDA reflects  
 499 subjective feelings of fear and it might behave independently from contingency knowledge, as  
 500 reported in other studies (Raio et al., 2012). Indeed, previous studies suggest that EDA is driven  
 501 by amygdala activity (Koizumi et al., 2016; Schiller et al., 2013).

502 Critically, the fact that implicit exposure only modulated SR in the first trial during the recovery  
 503 test might suggest that SR is more sensible than EDA, to subtle modulations in the affective  
 504 system, potentially induced during implicit exposure of CS1. In fact, SR as an automatic reflex,  
 505 has been considered to be tightly regulated by the defensive circuit reflecting amygdala activity  
 506 for negative affective valence (Hamm and Vaitl, 1996; Lang et al., 1990), whereas EDA appears  
 507 be more sensible to cognitive modulations by the explicit expectations of upcoming relevant  
 508 events (Sevenster et al., 2012b, 2014). Critically, if this is the case, our results would suggest  
 509 that implicit exposure might separately modulate the implicit trace of fearful memories.

510

511 Of note, NS showed an increment of defensive responses in the recovery test in both groups and  
 512 for both measures (when comparing the last trial of the exposure session with the first trial of  
 513 the spontaneous recovery test session), suggesting a global threat generalization effect.  
 514 Generalization in the physiological responses was further supported by the results in the OER  
 515 where participants reported to be ‘not sure’ of being shocked with NS presentation in the first  
 516 trials on day 3. Generalization of defensive responses in this type of paradigm has been  
 517 reported previously by other studies (Kindt and Soeter, 2013; Oyarzún et al., 2012; Soeter and  
 518 Kindt, 2011). In the context of our current design, it is possible that threat generalization was

519 transferred via shared element among all stimuli (Dunsmoor and Murphy, 2015); this is, air-  
520 puffs which were always presented at the end of each picture (to induce the blinking response)  
521 (see Materials and Methods section), and were frequently followed by the electric shock (75%  
522 of times for the CSs).

523

524 An important point to consider is the fact that no differential responses between conditioned and  
525 neutral stimuli, nor between groups (implicit vs explicit) were observed throughout the course  
526 of the exposure session. One possible explanation is that the use of the stereoscope during  
527 exposure (and not during day 1 or 3) added new contextual cues that impaired the retrieval of  
528 threatful associations and precluded discrimination among stimuli. The use of the stereoscope  
529 only on day 2 was aimed to increase ecological validity of the exposure task, as the acquisition  
530 of fear associations and re-exposure to fearful stimuli would be unlikely to occur throughout a  
531 stereoscope in a real context.

532

533 Our results are consistent with and build on previous studies using a very brief exposure (VBE)  
534 approach, in which pictures of spiders were presented very rapidly (i.e., 25 ms) in phobic  
535 patients, leading to long-lasting reduction of avoidance behavior (Siegel and Warren, 2013a,  
536 2013b). In an attempt to look for the mechanism underlying this effect, the authors (Siegel et al.,  
537 2017) scanned patients while exposed to either masked or clear visible phobic stimuli (in two  
538 separated groups). Counterintuitively, they showed that presentations of either masked or visible  
539 phobic stimuli activated or deactivated, respectively, brain regions that support emotional  
540 regulation like ventromedial PFC. They posited that limited awareness during exposure and lack  
541 of subjective fear as well as amygdala activity reduction might facilitate fear processing and  
542 emotional regulation. In addition, in other studies, it has been shown that when the prefrontal  
543 cortex is not engaged during extinction learning (due to a lesion or due to early development  
544 stage) subjects do not present recovery of defensive responses and amygdala is more involved  
545 during extinction, leading to a permanent extinction (Kim and Richardson, 2010; Koenigs et al.,  
546 2008). These results, point out the possibility that implicit exposure in our experiment might

547 have engaged similar mechanism that leads to attenuation of defensives responses, albeit only  
548 detected by SR measure.

549 Although the neural mechanism underlying CFS suppression effects are still largely unknown, a  
550 functional neuroimaging study using CFS and invisible presentations of fearful faces (Lapate et  
551 al., 2016) showed that while awareness of cues promoted PFC-amygdala functional  
552 connectivity, invisible presentation of faces did not engage such regulatory circuit. In the case of  
553 our implicit exposure paradigm, it is possible that faces are repetitively processed by the  
554 amygdala, via a fast subcortical pathway (Méndez-Bértolo et al., 2016) and by sensory areas  
555 representing CS while unaware and thus in the absence of activation of the defensive circuit.  
556 This, in turn, would promote emotional memory processing perhaps by the desensitization of  
557 low-level threat related regions, as posited by Siegel et al. 2017 (Siegel et al., 2017). In fact, it  
558 has been reported that ex-spider phobic patients that showed permanent extinction after 6  
559 months presented low activity in ventro-visual regions that were hyperresponsive to spiders  
560 before the therapy. Further, the authors revealed that reduced activity in a restricted portion of  
561 the same visual cortical region (right lateralized lingual gyrus) immediately after therapy  
562 predicted long-term permanence of extinction learning (Hauner et al., 2012). These results  
563 suggest that tapping into sensorial and low-level defensive networks might change the  
564 association between stimulus and defensive response, leading to permanent extinction without  
565 the need of prefrontal inhibitory control. As our experiment cannot account for any neural  
566 mechanism underlying CFS exposure further research is still imperative to examine such  
567 argument.

568 An important disadvantage and methodological limitation from CFS technique is that image  
569 suppression is often broken when presenting threatful images (Yang et al., 2007) which might  
570 limit its use as a sole tool in clinical settings. In our experiment, to reduce subject attrition by  
571 image suppression failure, we implemented a task where participants had to report the color of a  
572 central dot within the Mondrian. However, the fact that participants needed to hold their answer  
573 for a couple of seconds, might have comprised higher cognitive demand load during image

574 presentation. Whether this could have affected our results is unknown and more research would  
575 be needed to clear out this possibility. Despite implementation of this task, around half of our  
576 participants needed to be ruled out in this study for having broken the suppression effect. The  
577 fact that the selection criteria eliminated so many participants might constitute a potential  
578 confound as selected participants might share psychological features that make them more likely  
579 to show reduced defensive responses in the SR during spontaneous recovery. Although our  
580 selected participants rated equivalent scores in all psychological inventories, these results urge  
581 the need for further investigation and replications that could circumvent bias selection of  
582 participants by improving suppression effect during CFS exposure.

583 Our results deviate from those of Golkar & Ohman (2012) (Golkar and Öhman, 2012). In their  
584 experiment, the authors extinguished two conditioned stimuli; one under masked and the other  
585 under visible conditions. In contrast to our results, in their study the stimulus that was  
586 unconsciously extinguished presented more fear recovery than the one explicitly extinguished.  
587 However, it might well be the case that the parallel engagement of explicit and implicit learning  
588 could jeopardize the latter, as both explicit and implicit systems share encoding resources (Turk-  
589 Browne et al., 2006, p.) and might interact in a competitive manner (Kim and Baxter, 2001).  
590 Indeed, it has been suggested that the strong cognitive component of exposure-based therapies  
591 may actually preclude extinction learning at the implicit level (“Anxious: The Modern Mind in  
592 the Age of Anxiety by Joseph E LeDoux, book review,” 2015).

593 We believe that implicit exposure using CFS might promote processing of fearful memories in  
594 the subcortical threat related networks and facilitate emotional regulatory areas. The fact that  
595 fearful stimuli are experienced in the absence emotional distress in patients might help to  
596 change the threatful trace and improve the course of the therapy. Although our results provide  
597 encouraging evidence supporting these ideas, our findings call out the need for further  
598 investigation to circumvent methodological limitations, precise the mechanism involved, and  
599 uncover the potential of CFS implicit exposure as a valuable complementary procedure to  
600 further advance exposure-based psychotherapies.

601

602

## 603 **Acknowledgements**

604 The authors would like to thank Bert Molenkamp and David Cucurell for their technical  
605 assistance and Dieuwke Sevenster and Joaquín Morís for their advice on the experimental  
606 methodology. They are also thankful to Miguel Fullana and Rafael Torrubia for supplying  
607 critical equipment for this study and Ivonne Heideman for helping during data collection.

## 608 **Author Contributions**

609 J.O. conducted the experiments and analyzed the data, J.O., R.D.B and L.F. designed  
610 the experiments and wrote the paper, and J.O., E.C., and S.K. programmed the task.

611

## 612 **REFERENCES**

- 613 Baeyens, F., Eelen, P., Crombez, G., 1995. Pavlovian associations are forever: On classical  
614 conditioning and extinction. *J. Psychophysiol.* 9, 127–141.
- 615 Blumenthal, T.D., Cuthbert, B.N., Fillion, D.L., Hackley, S., Lipp, O.V., Van Boxtel, A., 2005.  
616 Committee report: Guidelines for human startle eyeblink electromyographic studies.  
617 *Psychophysiology* 42, 1–15. <https://doi.org/10.1111/j.1469-8986.2005.00271.x>
- 618 Brainard, D.H., 1997. The Psychophysics Toolbox. *Spat. Vis.* 10, 433–436.
- 619 Brewin, C.R., 2001. A cognitive neuroscience account of posttraumatic stress disorder and its  
620 treatment. *Behav. Res. Ther.* 39, 373–393. [https://doi.org/10.1016/S0005-](https://doi.org/10.1016/S0005-7967(00)00087-5)  
621 [7967\(00\)00087-5](https://doi.org/10.1016/S0005-7967(00)00087-5)
- 622 Craske, M.G., 1999. Anxiety disorders: Psychological approaches to theory and treatment.  
623 Basic Books.
- 624 Craske, M.G., Mystkowski, J.L., 2006. Exposure Therapy and Extinction: Clinical Studies, in:  
625 Craske, M.G., Hermans, D., Vansteenwegen, D. (Eds.), *Fear and Learning: From Basic*  
626 *Processes to Clinical Implications*. American Psychological Association, Washington,  
627 DC, US, pp. 217–233. <https://doi.org/10.1037/11474-011>
- 628 Dunsmoor, J.E., Murphy, G.L., 2015. Categories, concepts, and conditioning: how humans  
629 generalize fear. *Trends Cogn. Sci.* 19, 73–77. <https://doi.org/10.1016/j.tics.2014.12.003>
- 630 Ekman, P., 1976. *Pictures of facial affect*. Consult. Psychol. Press.
- 631 Fang, F., He, S., 2005. Cortical responses to invisible objects in the human dorsal and ventral  
632 pathways. *Nat. Neurosci.* 8, 1380–1385. <https://doi.org/10.1038/nn1537>
- 633 Golkar, A., Öhman, A., 2012. Fear extinction in humans: Effects of acquisition–extinction delay  
634 and masked stimulus presentations. *Biol. Psychol.* 91, 292–301.  
635 <https://doi.org/10.1016/j.biopsycho.2012.07.007>
- 636 Haerich, P., 1994. Startle Reflex Modification: Effects of Attention Vary With Emotional  
637 Valence. *Psychol. Sci.* 5, 407–410. <https://doi.org/10.1111/j.1467-9280.1994.tb00294.x>

- 638 Hamm, A.O., Vaitl, D., 1996. Affective learning: Awareness and aversion. *Psychophysiology*  
639 33, 698–710. <https://doi.org/10.1111/j.1469-8986.1996.tb02366.x>
- 640 Hauner, K.K., Mineka, S., Voss, J.L., Paller, K.A., 2012. Exposure therapy triggers lasting  
641 reorganization of neural fear processing. *Proc. Natl. Acad. Sci.* 109, 9203–9208.  
642 <https://doi.org/10.1073/pnas.1205242109>
- 643 Hawk, L.W., Cook, E.W., 1997. Affective modulation of tactile startle. *Psychophysiology* 34,  
644 23–31. <https://doi.org/10.1111/j.1469-8986.1997.tb02412.x>
- 645 J, W., Nadel, L., 1985. Stress-induced recovery of fears and phobias. *Psychol. Rev.* 92, 512–  
646 531. <https://doi.org/10.1037/0033-295X.92.4.512>
- 647 Kim, J.H., Richardson, R., 2010. New Findings on Extinction of Conditioned Fear Early in  
648 Development: Theoretical and Clinical Implications. *Biol. Psychiatry, Posttraumatic*  
649 *Stress Disorder: Translational Neuroscience Perspectives on Gene-Environment*  
650 *Interactions* 67, 297–303. <https://doi.org/10.1016/j.biopsych.2009.09.003>
- 651 Kim, J.J., Baxter, M.G., 2001. Multiple brain-memory systems: the whole does not equal the  
652 sum of its parts. *Trends Neurosci.* 24, 324–330. [https://doi.org/10.1016/S0166-](https://doi.org/10.1016/S0166-2236(00)01818-X)  
653 [2236\(00\)01818-X](https://doi.org/10.1016/S0166-2236(00)01818-X)
- 654 Kindt, M., Soeter, M., 2013. Reconsolidation in a human fear conditioning study: A test of  
655 extinction as updating mechanism. *Biol. Psychol., SI: Human Fear Conditioning* 92,  
656 43–50. <https://doi.org/10.1016/j.biopsycho.2011.09.016>
- 657 Koenigs, M., Huey, E.D., Raymont, V., Cheon, B., Solomon, J., Wassermann, E.M., Grafman,  
658 J., 2008. Focal brain damage protects against post-traumatic stress disorder in combat  
659 veterans. *Nat. Neurosci.* 11, 232–237. <https://doi.org/10.1038/nn2032>
- 660 Koizumi, A., Amano, K., Cortese, A., Shibata, K., Yoshida, W., Seymour, B., Kawato, M., Lau,  
661 H., 2016. Fear reduction without fear through reinforcement of neural activity that  
662 bypasses conscious exposure. *Nat. Hum. Behav.* 1, 0006.  
663 <https://doi.org/10.1038/s41562-016-0006>
- 664 Konarski, J.Z., McIntyre, R.S., Soczynska, J.K., Kennedy, S.H., 2007. Neuroimaging  
665 Approaches in Mood Disorders: Technique and Clinical Implications. *Ann. Clin.*  
666 *Psychiatry* 19, 265–277. <https://doi.org/10.3109/10401230701653435>
- 667 Lang, P.J., Bradley, M.M., Cuthbert, B.N., 1990. Emotion, attention, and the startle reflex.  
668 *Psychol. Rev.* 97, 377–395.
- 669 Lang, P.J., Davis, M., Öhman, A., 2000. Fear and anxiety: animal models and human cognitive  
670 psychophysiology. *J. Affect. Disord., Arousal in Anxiety* 61, 137–159.  
671 [https://doi.org/10.1016/S0165-0327\(00\)00343-8](https://doi.org/10.1016/S0165-0327(00)00343-8)
- 672 Lapate, R.C., Rokers, B., Tromp, D.P.M., Orfali, N.S., Oler, J.A., Doran, S.T., Adluru, N.,  
673 Alexander, A.L., Davidson, R.J., 2016. Awareness of Emotional Stimuli Determines the  
674 Behavioral Consequences of Amygdala Activation and Amygdala-Prefrontal  
675 Connectivity. *Sci. Rep.* 6. <https://doi.org/10.1038/srep25826>
- 676 LeDoux, J.E., 1993. Emotional memory systems in the brain. *Behav. Brain Res.* 58, 69–79.  
677 [https://doi.org/10.1016/0166-4328\(93\)90091-4](https://doi.org/10.1016/0166-4328(93)90091-4)
- 678 LeDoux, J.E., 2015. *Anxious: The Modern Mind in the Age of Anxiety* by Joseph E LeDoux,  
679 book review. Oneworld Publications.
- 680 LeDoux, J.E., Brown, R., 2017. A higher-order theory of emotional consciousness. *Proc. Natl.*  
681 *Acad. Sci.* 114, E2016–E2025. <https://doi.org/10.1073/pnas.1619316114>
- 682 Lin, Z., He, S., 2009. Seeing the invisible: The scope and limits of unconscious processing in  
683 binocular rivalry. *Prog. Neurobiol.* 87, 195–211.  
684 <https://doi.org/10.1016/j.pneurobio.2008.09.002>
- 685 Lovibond, P.F., 2003. Causal beliefs and conditioned responses: Retrospective revaluation  
686 induced by experience and by instruction. *J. Exp. Psychol. Learn. Mem. Cogn.* 29, 97–  
687 106. <https://doi.org/10.1037/0278-7393.29.1.97>
- 688 McFadyen, J., Mermillod, M., Mattingley, J.B., Halász, V., Garrido, M.I., 2017. A Rapid  
689 Subcortical Amygdala Route for Faces Irrespective of Spatial Frequency and Emotion.  
690 *J. Neurosci.* 37, 3864–3874. <https://doi.org/10.1523/JNEUROSCI.3525-16.2017>



691 Méndez-Bértolo, C., Moratti, S., Toledano, R., Lopez-Sosa, F., Martínez-Alvarez, R., Mah,  
692 Y.H., Vuilleumier, P., Gil-Nagel, A., Strange, B.A., 2016. A fast pathway for fear in  
693 human amygdala. *Nat. Neurosci.* <https://doi.org/10.1038/nn.4324>  
694 Milad, M.R., Quirk, G.J., 2012. Fear Extinction as a Model for Translational Neuroscience: Ten  
695 Years of Progress. *Annu. Rev. Psychol.* 63, 129–151.  
696 <https://doi.org/10.1146/annurev.psych.121208.131631>  
697 Myers, K.M., Davis, M., 2002. Behavioral and Neural Analysis of Extinction. *Neuron* 36, 567–  
698 584. [https://doi.org/10.1016/S0896-6273\(02\)01064-4](https://doi.org/10.1016/S0896-6273(02)01064-4)  
699 Oyarzún, J.P., Lopez-Barroso, D., Fuentemilla, L., Cucurell, D., Pedraza, C., Rodriguez-  
700 Fornells, A., Diego-Balaguer, R. de, 2012. Updating Fearful Memories with Extinction  
701 Training during Reconsolidation: A Human Study Using Auditory Aversive Stimuli.  
702 *PLOS ONE* 7, e38849. <https://doi.org/10.1371/journal.pone.0038849>  
703 Pare, D., Duvarci, S., 2012. Amygdala microcircuits mediating fear expression and extinction.  
704 *Curr. Opin. Neurobiol., Microcircuits* 22, 717–723.  
705 <https://doi.org/10.1016/j.conb.2012.02.014>  
706 Pelli, D.G., 1997. The VideoToolbox software for visual psychophysics: transforming numbers  
707 into movies. *Spat. Vis.* 10, 437–442.  
708 Phelps, E.A., Delgado, M.R., Nearing, K.I., LeDoux, J.E., 2004. Extinction Learning in  
709 Humans: Role of the Amygdala and vmPFC. *Neuron* 43, 897–905.  
710 <https://doi.org/10.1016/j.neuron.2004.08.042>  
711 Porac, C., Coren, S., 1976. The dominant eye. *Psychol. Bull.* 83, 880.  
712 Purkis, H.M., Lipp, O.V., 2001. Does Affective Learning Exist in the Absence of Contingency  
713 Awareness? *Learn. Motiv.* 32, 84–99. <https://doi.org/10.1006/lmot.2000.1066>  
714 Raio, C.M., Carmel, D., Carrasco, M., Phelps, E.A., 2012. Nonconscious fear is quickly  
715 acquired but swiftly forgotten. *Curr. Biol. CB* 22, R477–479.  
716 <https://doi.org/10.1016/j.cub.2012.04.023>  
717 Rescorla, R.A., 2004. Spontaneous Recovery. *Learn. Mem.* 11, 501–509.  
718 <https://doi.org/10.1101/lm.77504>  
719 Rothbaum, B.O., Davis, M., 2003. Applying Learning Principles to the Treatment of Post-  
720 Trauma Reactions. *Ann. N. Y. Acad. Sci.* 1008, 112–121.  
721 <https://doi.org/10.1196/annals.1301.012>  
722 Schiller, D., Kanen, J.W., LeDoux, J.E., Monfils, M.-H., Phelps, E.A., 2013. Extinction during  
723 reconsolidation of threat memory diminishes prefrontal cortex involvement. *Proc. Natl.*  
724 *Acad. Sci. U. S. A.* 110, 20040–20045. <https://doi.org/10.1073/pnas.1320322110>  
725 Schiller, D., Monfils, M.-H., Raio, C.M., Johnson, D.C., LeDoux, J.E., Phelps, E.A., 2010.  
726 Preventing the return of fear in humans using reconsolidation update mechanisms.  
727 *Nature* 463, 49–53. <https://doi.org/10.1038/nature08637>  
728 Sevenster, D., Beckers, T., Kindt, M., 2014. Fear conditioning of SCR but not the startle reflex  
729 requires conscious discrimination of threat and safety. *Front. Behav. Neurosci.* 8.  
730 <https://doi.org/10.3389/fnbeh.2014.00032>  
731 Sevenster, D., Beckers, T., Kindt, M., 2012a. Retrieval per se is not sufficient to trigger  
732 reconsolidation of human fear memory. *Neurobiol. Learn. Mem.* 97, 338–345.  
733 <https://doi.org/10.1016/j.nlm.2012.01.009>  
734 Sevenster, D., Beckers, T., Kindt, M., 2012b. Instructed extinction differentially affects the  
735 emotional and cognitive expression of associative fear memory. *Psychophysiology* 49,  
736 1426–1435. <https://doi.org/10.1111/j.1469-8986.2012.01450.x>  
737 Siegel, P., Warren, R., 2013a. The effect of very brief exposure on experienced fear after in vivo  
738 exposure. *Cogn. Emot.* 27, 1013–1022. <https://doi.org/10.1080/02699931.2012.756803>  
739 Siegel, P., Warren, R., 2013b. Less is still more: maintenance of the very brief exposure effect 1  
740 year later. *Emot. Wash. DC* 13, 338–344. <https://doi.org/10.1037/a0030833>  
741 Siegel, P., Warren, R., Wang, Z., Yang, J., Cohen, D., Anderson, J.F., Murray, L., Peterson,  
742 B.S., 2017. Less is more: Neural activity during very brief and clearly visible exposure  
743 to phobic stimuli. *Hum. Brain Mapp.* 38, 2466–2481.  
744 <https://doi.org/10.1002/hbm.23533>

- 745 Siegel, P., Weinberger, J., 2009. Very brief exposure: The effects of unreportable stimuli on  
746 fearful behavior. *Conscious. Cogn.* 18, 939–951.  
747 <https://doi.org/10.1016/j.concog.2009.08.001>
- 748 Soeter, M., Kindt, M., 2011. Disrupting reconsolidation: Pharmacological and behavioral  
749 manipulations. *Learn. Mem.* 18, 357–366. <https://doi.org/10.1101/lm.2148511>
- 750 Soeter, M., Kindt, M., 2010. Dissociating response systems: erasing fear from memory.  
751 *Neurobiol. Learn. Mem.* 94, 30–41. <https://doi.org/10.1016/j.nlm.2010.03.004>
- 752 Sotres-Bayon, F., Cain, C.K., LeDoux, J.E., 2006. Brain Mechanisms of Fear Extinction:  
753 Historical Perspectives on the Contribution of Prefrontal Cortex. *Biol. Psychiatry* 60,  
754 329–336. <https://doi.org/10.1016/j.biopsych.2005.10.012>
- 755 Spielberger, C.D., 1983. Manual for the State-Trait Anxiety Inventory STAI (Form Y) (“Self-  
756 Evaluation Questionnaire”).
- 757 Tsuchiya, N., Koch, C., 2005. Continuous flash suppression reduces negative afterimages. *Nat.*  
758 *Neurosci.* 8, 1096–1101. <https://doi.org/10.1038/nn1500>
- 759 Turk-Browne, N.B., Yi, D.-J., Chun, M.M., 2006. Linking Implicit and Explicit Memory:  
760 Common Encoding Factors and Shared Representations. *Neuron* 49, 917–927.  
761 <https://doi.org/10.1016/j.neuron.2006.01.030>
- 762 Wagnild, G.M., Young, H.M., 1993. Development and psychometric evaluation of the  
763 Resilience Scale. *J. Nurs. Meas.* 1, 165–178.
- 764 Warren, V.T., Anderson, K.M., Kwon, C., Bosshardt, L., Jovanovic, T., Bradley, B., Norrholm,  
765 S.D., 2014. Human fear extinction and return of fear using reconsolidation update  
766 mechanisms: The contribution of on-line expectancy ratings. *Neurobiol. Learn. Mem.*,  
767 Extinction 113, 165–173. <https://doi.org/10.1016/j.nlm.2013.10.014>
- 768 Yang, E., Zald, D.H., Blake, R., 2007. Fearful expressions gain preferential access to awareness  
769 during continuous flash suppression. *Emotion* 7, 882–886.  
770 <https://doi.org/10.1037/1528-3542.7.4.882>

## 773 LEGENDS

774 **Figure 1. Three-day experimental design: acquisition exposure and spontaneous**  
775 **recovery test.** Two faces were fear-conditioned on day 1 (CS1 and CS2) whereas a  
776 third face served as the neutral stimulus NS. CS1 and the NS were presented with no  
777 reinforcement on the second day using a continuous flash suppression (CFS) setting  
778 (with a stereoscope and colorful patches). These Mondrians were continuously flashing  
779 during picture presentation in the implicit group but were fixed and briefly presented in  
780 the explicit group. Acquisition on day 1 and Recovery Test on day 3 were conducted  
781 explicitly with faces at the center of the screen and without CFS setting.

782

783 **Figure 2. Threat potentiated startle responses trial by trial throughout the 3-day**  
 784 **experiment for both experimental groups. The top panel depicts implicit exposure**  
 785 **group. The lower panel depicts explicit exposure group.** Mean standardized startle  
 786 responses were calculated using all trials within each session for each group. Plots  
 787 represent the mean response of (A) CS1 CS2 and NS during acquisition on day 1 (B)  
 788 CS1 and NS during exposure on day 2 (C) CS1 CS2 and NS during spontaneous  
 789 recovery on day 3. EMG: electromyography. Error bars represent standard error of the  
 790 mean (SEM).

791

792 **Figure 3. Trial-by-trial electrodermal activity throughout the 3-day experiment**  
 793 **for both experimental groups. The top panel depicts implicit exposure group. The**  
 794 **lower panel depicts explicit exposure group.** Mean standardized electrodermal  
 795 activity was quantified using all trials within each session for each group. Plots  
 796 represent the mean electrodermal activity of (A) CS1 CS2 and NS during acquisition on  
 797 day 1 (B) CS1 and NS during exposure on day 2 (C) CS1 CS2 and NS during  
 798 spontaneous recovery on day 3. EDA: electrodermal activity. Error bars represent  
 799 standard error of the mean (SEM).

800

801 **Figure 4. Recovery of defensive responses for both experimental groups.** Mean  
 802 standardized startle responses were calculated using all trials for CS1 and NS during  
 803 exposure and spontaneous recovery sessions for each group in each measure. Plots  
 804 represent the last trial of exposure on day 2 and the first trial of spontaneous recovery on  
 805 day 3. (A) Mean of startle response for the implicit group. (B) Mean of startle response  
 806 for the explicit group (C) Mean of electrodermal activity for the implicit group. (D)

807 Mean of electrodermal activity for the explicit group. EMG: electromyography; EDA:  
 808 electrodermal activity, small\*:  $p < .05$  comparison for each stimuli between phases,  
 809 big\*: main effect of phase. Error bars represent standard error of the mean (SEM).

810

811 **Figure 5. Online threat expectancy ratings during recovery test.** During each picture  
 812 presentation, subjects indicated whether they either expected (pressed 3), did not expect  
 813 (pressed 1) or were not sure about (pressed 2) imminent shock occurrence. Error bars  
 814 represent standard error of the mean (SEM); (a.u) arbitrary unit.

815

816

817

818

819

## 820 **FIGURES**

821 **Figure 1.**

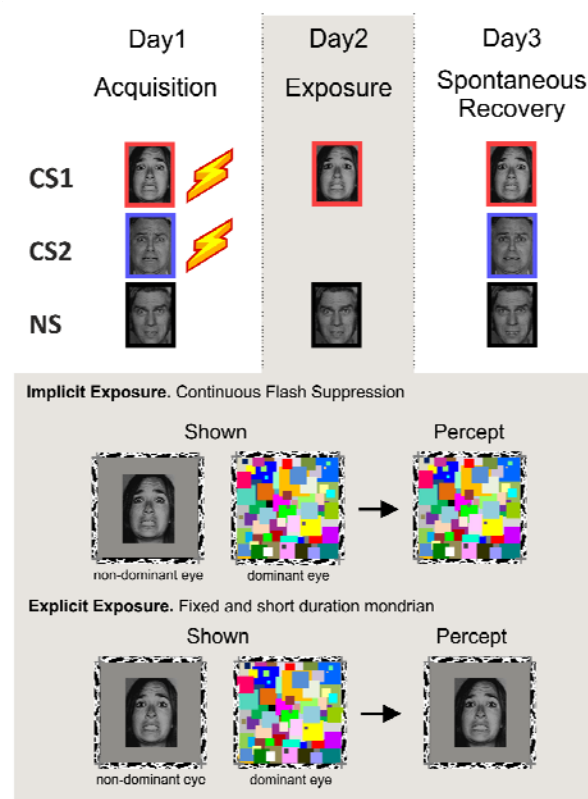

822

823

824

825

826

827

828

829

830 **Figure 2.**

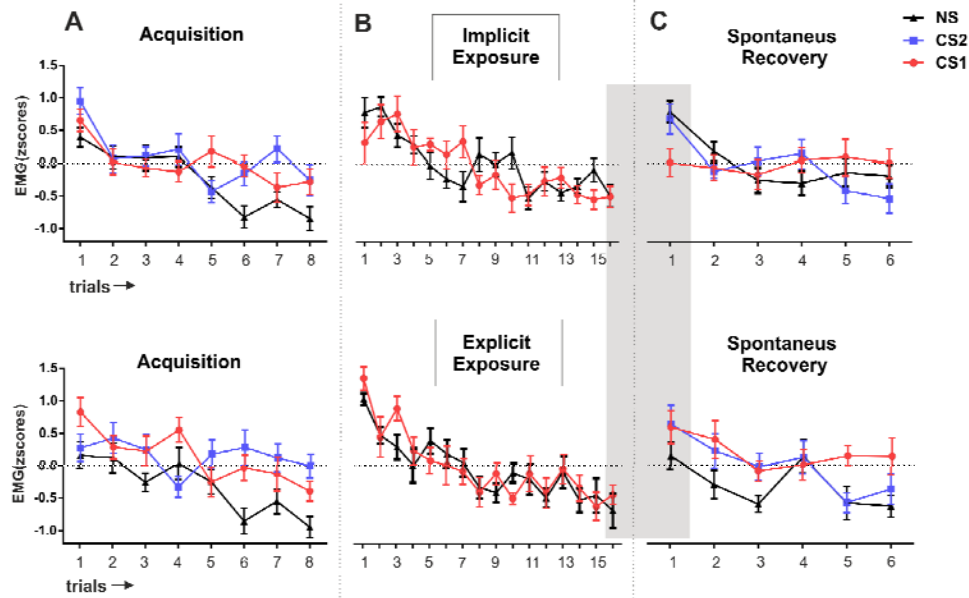

831

832 **Figure 3.**

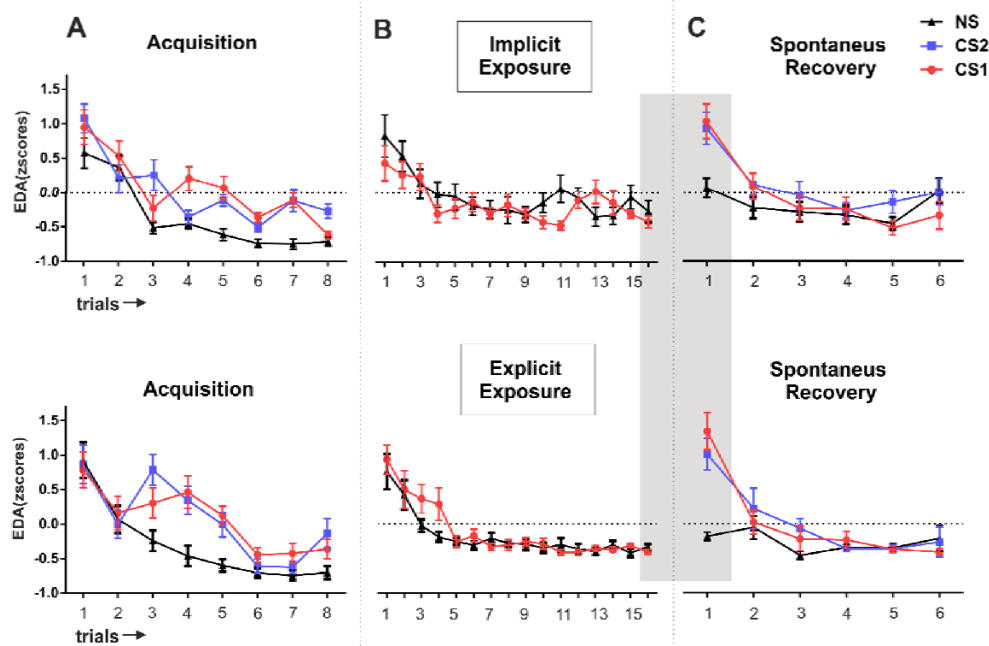

833

834

835 **Figure 4.**

# Spontaneous Recovery test

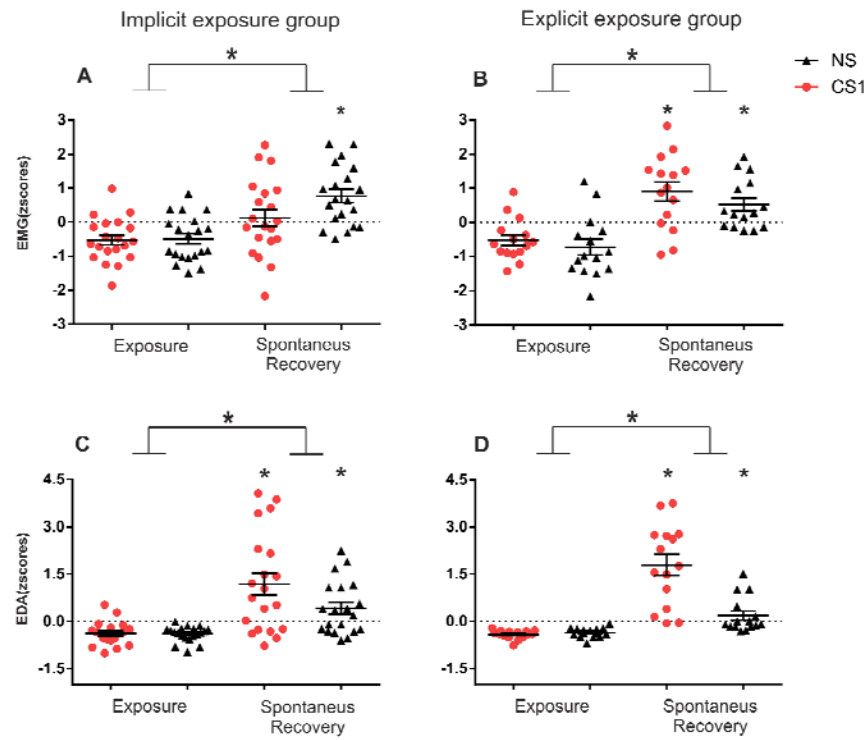

**Figure 5.**

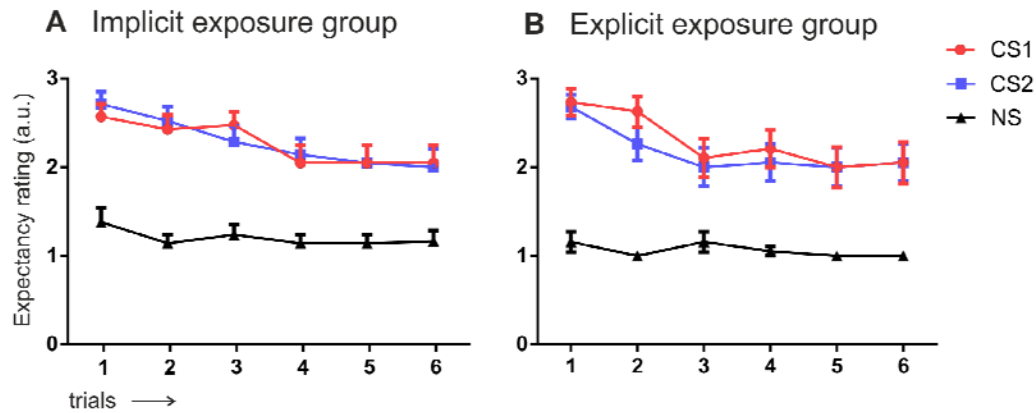

842 **Table 1**

843 Descriptive statistics of inventory scores

| Inventory         | Implicit |       | Explicit |      |
|-------------------|----------|-------|----------|------|
|                   | Mean     | SD    | Mean     | SD   |
| <b>STAI-state</b> | 10.15    | 5.33  | 11.06    | 4.13 |
| <b>STAI-trait</b> | 9.7      | 7.6   | 13.0     | 3.4  |
| <b>PC</b>         | 91.22    | 12.56 | 91.46    | 9.04 |
| <b>ASL</b>        | 37.11    | 5.77  | 40.26    | 4.11 |

844 *Note:* PC = Personal Competence; ASL = Acceptance of Self and Life

845

846

847

848
